# Supplementary material
Source: PubMed Central journal article supplement (PMC2781523)
Supplement: supp_M109.041830_jbc.M109.041830-1.pdf [file supp_M109.041830_jbc.M109.041830-1.pdf]

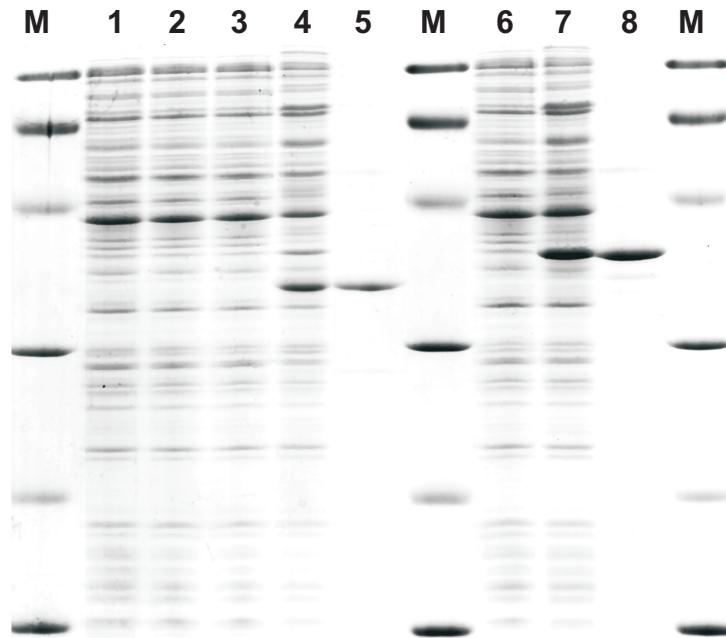

**Supplemental Figure 1. Overexpression in *Escherichia coli* and purification of AtNDT1 and AtNDT2.**

Proteins were separated by SDS-PAGE and stained with Coomassie blue dye. AtNDT1, lanes 1-5, AtNDT2, lanes 6-8; Lanes M, markers (rabbit muscle phosphorylase b, bovine serum albumin, ovalbumin, bovine carbonic anhydrase, soybean trypsin inhibitor and lysozyme. BIO-RAD, low range molecular weight standard); lanes 1-4, 6 and 7, *E.coli* C0214(DE3) containing the expression vector, without (lanes 1 and 2), with the coding sequence of AtNDT1 (lanes 3 and 4) and with the coding sequence of AtNDT2 (lanes 6 and 7). Samples were taken immediately before induction (lanes 1, 3 and 6) and 5 h later (lanes 2, 4 and 7). The same number of bacteria was analyzed in each sample. Lanes 5 and 8, purified AtNDT1 (~2 µg) and purified AtNDT2 (~4 µg) originated from bacteria shown in lanes 4 and 7, respectively.
